# Supplementary material
Source: publisher figshare collection journal article supplement (https://frontiersin.figshare.com/ndownloader/files/22043745)
Supplement: Supplementary file [file 22043745]

# Which body would you like to have? The impact of embodied perspective on body perception and body evaluation in immersive virtual reality

Authors: Solène Neyret, Anna I. Bellido Rivas, Xavi Navarro, Mel Slater

## SUPPLEMENTARY MATERIAL:

---

### PARTICIPANTS

There was no significant difference in the age of the participants, one participant was a bit older than the average (38 years old) but this did not affect the results obtained.

Table S1: Age characteristics of the participants.

|               | Age (mean $\pm$ SD) | Age (Min) | Age (Max) |
|---------------|---------------------|-----------|-----------|
| Total (n=19)  | 24.8 $\pm$ 5.64     | 18        | 38        |
| Females (n=9) | 23.9 $\pm$ 6.79     | 18        | 38        |
| Males (n=10)  | 25.6 $\pm$ 4.59     | 19        | 32        |

The BMI for both genders were distributed in the range of healthy weight, there was one female underweight and one male overweight. The BMI is calculated as follows: Weight/ (Height  $\times$  Height).

Table S2: BMI (body mass index) characteristics of the participants. The scale is as follows, 16.0 to 18.5: underweight, 18.5 to 25: healthy weight, 25 to 30: overweight, 30 to 35: Moderately obese

|               | BMI (mean $\pm$ SD) | BMI (Min) | BMI (Max) |
|---------------|---------------------|-----------|-----------|
| Total (n=19)  | 23.6 $\pm$ 3.42     | 17.75     | 33.33     |
| Females (n=9) | 22.8 $\pm$ 3.31     | 17.75     | 27.25     |
| Males (n=10)  | 24.3 $\pm$ 3.54     | 20.30     | 33.33     |

## CLINICAL QUESTIONNAIRES

### BSQ-34

Table S3: Scores obtained in the body shape questionnaire (BSQ), the scale is as follows, <81: no concern with shape, 81-110: low concern with shape, 111-140: moderate concern with shape, >140: concern with shape.

|               | BSQ_pre (mean $\pm$ SE) | BSQ_post (mean $\pm$ SE) |
|---------------|-------------------------|--------------------------|
| Females (n=9) | 80.55 $\pm$ 4.26        | 80.55 $\pm$ 5.74         |
| Males (n=10)  | 53.6 $\pm$ 4.84         | 58.7 $\pm$ 4.53          |

### EDI-2

Table S4: Scores of the Drive for thinness (DT) subscale of the EDI-2 questionnaire. The scale is as follows, 0: percentile 32, 2: percentile 59, 4: percentile 78, 17: percentile 99

|               | DT_pre (mean $\pm$ SE) | DT_post (mean $\pm$ SE) |
|---------------|------------------------|-------------------------|
| Females (n=9) | 3.44 $\pm$ 0.83        | 2.55 $\pm$ 0.75         |
| Males (n=10)  | 0.4 $\pm$ 0.22         | 0.6 $\pm$ 0.43          |

Table S5: Scores of the Body dissatisfaction (BD) subscale of the EDI-2 questionnaire. The scale is the following, 0: percentile 26, 3: percentile 56, 6: percentile 75, 24: percentile 99

|               | BD_pre (mean $\pm$ SE) | BD_post (mean $\pm$ SE) |
|---------------|------------------------|-------------------------|
| Females (n=9) | 7.11 $\pm$ 1.83        | 3.89 $\pm$ 1.49         |
| Males (n=10)  | 1.2 $\pm$ 0.76         | 2.3 $\pm$ 1.00          |

## BODY IDENTIFICATION

Table S6: Final evaluation with the three avatars in front of the participant, frequency of choice for Females

| Females    | Which body do you think is your real body? | Which body do you think is your ideal body? | Which body would you like to have? |
|------------|--------------------------------------------|---------------------------------------------|------------------------------------|
| Body Image | 3                                          | 1                                           | <b>0</b>                           |
| Ideal Body | 1                                          | 5                                           | 4                                  |
| Real Body  | 5                                          | 3                                           | 5                                  |

Table S7: Final evaluation with the three avatars in front of the participant, frequency of choice for Males

| Males      | Which body do you think is your real body? | Which body do you think is your ideal body? | Which body would you like to have? |
|------------|--------------------------------------------|---------------------------------------------|------------------------------------|
| Body Image | 3                                          | 4                                           | <b>5</b>                           |
| Ideal Body | 0                                          | 4                                           | 1                                  |
| Real Body  | <b>7</b>                                   | 2                                           | 4                                  |

Table S8: Final evaluation with the three avatars in front of the participant, frequency of choice for Males and Females

| Total      | Which body do you think is your real body? | Which body do you think is your ideal body? | Which body would you like to have? |
|------------|--------------------------------------------|---------------------------------------------|------------------------------------|
| Body Image | 6                                          | 5                                           | 5                                  |
| Ideal Body | 1                                          | <b>9</b>                                    | 5                                  |
| Real Body  | <b>12</b>                                  | 5                                           | <b>9</b>                           |
